# Supplementary material
Source: PubMed Central journal article supplement (PMC4313849)
Supplement: pnas.201415718SI.pdf [file pnas.201415718SI.pdf]

# Supporting Information

Lalonde and Konhauser 10.1073/pnas.1415718112

**Table S1. Compiled data for net O<sub>2</sub> production rates measured in situ for diverse benthic microbial ecosystems**

| Ref. | Benthic environment                                               | Net O <sub>2</sub> (nmol/cm <sup>2</sup> /s) | Environment* |
|------|-------------------------------------------------------------------|----------------------------------------------|--------------|
| 1    | Submerged Wadden sea intertidal flats                             | 0.077                                        | 1            |
| 1    | Submerged Wadden sea intertidal flats                             | 0.074                                        | 1            |
| 1    | Submerged Wadden sea intertidal flats                             | 0.056                                        | 1            |
| 1    | Submerged Wadden sea intertidal flats                             | 0.054                                        | 1            |
| 1    | Submerged Wadden sea intertidal flats                             | 0.043                                        | 1            |
| 1    | Submerged Wadden sea intertidal flats                             | 0.020                                        | 1            |
| 1    | Submerged Wadden sea intertidal flats                             | 0.019                                        | 1            |
| 1    | Submerged Wadden sea intertidal flats                             | 0.013                                        | 1            |
| 1    | Submerged Wadden sea intertidal flats                             | 0.003                                        | 1            |
| 2    | Cyanobacterial mats, Guerrero Negro (Mexico)                      | 0.267                                        | 1            |
| 3    | Cyanobacterial mats, Ebro delta (Spain)                           | 0.467                                        | 1            |
| 4    | Brackish intertidal sandy microbial mat                           | 0.240                                        | 1            |
| 5    | Cyanobacterial mats, hypersaline Chiprana lake (Spain)            | 0.133                                        | 1            |
| 6    | Hypersaline desert lake cyanobacterial mat                        | 0.926                                        | 1            |
| 7    | Cyanobacterial mats, tropical lagoon                              | 0.283                                        | 1            |
| 7    | Cyanobacterial mats, tropical lagoon                              | 0.217                                        | 1            |
| 7    | Cyanobacterial mats, tropical lagoon                              | 0.175                                        | 1            |
| 8    | Carbonate sediments, Great Barrier Reef                           | 0.136                                        | 1            |
| 9    | Shallow marine sediments, brackish water, bacteria, and diatoms   | 0.419                                        | 1            |
| 9    | Shallow marine sediments, brackish water, bacteria, and diatoms   | 0.281                                        | 1            |
| 9    | Shallow marine sediments, brackish water, bacteria, and diatoms   | 0.222                                        | 1            |
| 9    | Shallow marine sediments, brackish water, bacteria, and diatoms   | 0.009                                        | 1            |
| 10   | Hypersaline desert lake cyanobacterial mat                        | 0.275                                        | 1            |
| 10   | Hypersaline desert lake cyanobacterial mat                        | 0.050                                        | 1            |
| 11   | Cyanobacterial mats, Solar lake (Egypt)                           | 0.100                                        | 1            |
| 12   | Cyanobacterial mats, commercial salt pond                         | 0.700                                        | 1            |
| 12   | Cyanobacterial mats, commercial salt pond                         | 0.400                                        | 1            |
| 12   | Cyanobacterial mats, commercial salt pond                         | 0.300                                        | 1            |
| 12   | Cyanobacterial mats, commercial salt pond                         | 0.250                                        | 1            |
| 13   | Hypersaline cyanobacterial saltern crusts (gypsum)                | 0.057                                        | 1            |
| 14   | Cyanobacterial mats in ponds on McMurdo Ice shelf, Antarctica     | 1.183                                        | 2            |
| 14   | Cyanobacterial mats in ponds on McMurdo Ice shelf, Antarctica     | 1.131                                        | 2            |
| 14   | Cyanobacterial mats in ponds on McMurdo Ice shelf, Antarctica     | 0.717                                        | 2            |
| 14   | Cyanobacterial mats in ponds on McMurdo Ice shelf, Antarctica     | 0.703                                        | 2            |
| 14   | Cyanobacterial mats in ponds on McMurdo Ice shelf, Antarctica     | 0.453                                        | 2            |
| 14   | Cyanobacterial mats in ponds on McMurdo Ice shelf, Antarctica     | 0.408                                        | 2            |
| 15   | Green algal mats in two acidic mining lakes                       | 0.014                                        | 2            |
| 16   | Green algal mat in acidic mining lake                             | 0.098                                        | 2            |
| 16   | Green algal mat in acidic mining lake                             | 0.002                                        | 2            |
| 17   | Diatom mats in acidic mining lake                                 | 0.041                                        | 2            |
| 17   | Diatom mats in acidic mining lake                                 | 0.029                                        | 2            |
| 18   | Survey of 20 literature studies of freshwater green algal mats    | 0.291                                        | 2            |
| 19   | Green algal mat in experimentally acidified lake                  | 0.257                                        | 2            |
| 20   | Epilithic cyanobacterial biofilms, wastewater trickling filter    | 0.249                                        | 3            |
| 20   | Epilithic cyanobacterial biofilms, wastewater trickling filter    | 0.244                                        | 3            |
| 20   | Epilithic cyanobacterial biofilms, wastewater trickling filter    | 0.229                                        | 3            |
| 20   | Rapidly flowing freshwater stream, epilithic diatom-dominated mat | 0.221                                        | 3            |
| 20   | Rapidly flowing freshwater stream, epilithic diatom-dominated mat | 0.194                                        | 3            |
| 20   | Rapidly flowing freshwater stream, epilithic diatom-dominated mat | 0.150                                        | 3            |
| 20   | Epilithic cyanobacterial biofilms, wastewater trickling filter    | 0.144                                        | 3            |
| 20   | Rapidly flowing freshwater stream, epilithic diatom-dominated mat | 0.139                                        | 3            |
| 20   | Rapidly flowing freshwater stream, epilithic diatom-dominated mat | 0.132                                        | 3            |
| 20   | Epilithic cyanobacterial biofilms, wastewater trickling filter    | 0.110                                        | 3            |
| 20   | Epilithic cyanobacterial biofilms, wastewater trickling filter    | 0.106                                        | 3            |
| 20   | Rapidly flowing freshwater stream, epilithic diatom-dominated mat | 0.084                                        | 3            |
| 20   | Rapidly flowing freshwater stream, epilithic diatom-dominated mat | 0.063                                        | 3            |

**Table S1. Cont.**

| Ref. | Benthic environment                                               | Net O <sub>2</sub> (nmol/cm <sup>2</sup> /s) | Environment* |
|------|-------------------------------------------------------------------|----------------------------------------------|--------------|
| 20   | Rapidly flowing freshwater stream, epilithic diatom-dominated mat | 0.043                                        | 3            |
| 21   | Epilithic cyanobacterial biofilms, wastewater trickling filter    | 0.282                                        | 3            |
| 21   | Epilithic cyanobacterial biofilms, wastewater trickling filter    | 0.262                                        | 3            |
| 21   | Epilithic cyanobacterial biofilms, wastewater trickling filter    | 0.260                                        | 3            |
| 21   | Epilithic cyanobacterial biofilms, wastewater trickling filter    | 0.217                                        | 3            |
| 21   | Epilithic cyanobacterial biofilms, wastewater trickling filter    | 0.139                                        | 3            |
| 21   | Epilithic cyanobacterial biofilms, wastewater trickling filter    | 0.121                                        | 3            |
| 21   | Epilithic cyanobacterial biofilms, wastewater trickling filter    | 0.111                                        | 3            |
| 22   | Stream sediment                                                   | 0.367                                        | 3            |
| 23   | Green algal mat in Alaskan tundra stream                          | 0.004                                        | 3            |
| 24   | Cyanobacterial mats, Antarctic dry valley streambeds              | 0.597                                        | 3            |
| 24   | Cyanobacterial mats, Antarctic dry valley streambeds              | 0.458                                        | 3            |
| 24   | Cyanobacterial mats, Antarctic dry valley streambeds              | 0.411                                        | 3            |
| 24   | Cyanobacterial mats, Antarctic dry valley streambeds              | 0.392                                        | 3            |
| 24   | Cyanobacterial mats, Antarctic dry valley streambeds              | 0.369                                        | 3            |
| 24   | Cyanobacterial mats, Antarctic dry valley streambeds              | 0.253                                        | 3            |
| 24   | Cyanobacterial mats, Antarctic dry valley streambeds              | 0.244                                        | 3            |
| 24   | Cyanobacterial mats, Antarctic dry valley streambeds              | 0.169                                        | 3            |
| 24   | Cyanobacterial mats, Antarctic dry valley streambeds              | 0.108                                        | 3            |
| 24   | Cyanobacterial mats, Antarctic dry valley streambeds              | 0.086                                        | 3            |
| 25   | Endolithic cyanobacterial in sandstone                            | 0.200                                        | 4            |
| 26   | Cyanobacterial desert crust                                       | 0.117                                        | 4            |
| 26   | Cyanobacterial desert crust                                       | 0.041                                        | 4            |
| 27   | Cyanobacterial mats under ice covered Lake Hoare, Antarctica      | 0.015                                        | 5            |
| 27   | Cyanobacterial mats under ice covered Lake Hoare, Antarctica      | 0.015                                        | 5            |
| 28   | Benthic brown algae (pennate diatoms) under sea ice               | 0.116                                        | 5            |
| 29   | Cyanobacterial mats under ice covered Lake Hoare, Antarctica      | 0.014                                        | 5            |
| 29   | Cyanobacterial mats under ice covered Lake Hoare, Antarctica      | 0.003                                        | 5            |

\*Environments: 1-coastal or hypersaline; 2-lacustrine; 3-river/stream; 4-BSC or endolithic; 5-under ice.

1. Billerbeck M, Roy H, Bosselmann K, Huettel M (2007) Benthic photosynthesis in submerged Wadden Sea intertidal flats. *Estuar Coast Shelf Sci* 71:704–716.
2. Epping E, Jorgensen BB (1996) Light-enhanced oxygen respiration in benthic phototrophic communities. *Mar Ecol Prog Ser* 139:193–203.
3. Epping E, Kühl M (2000) The responses of photosynthesis and oxygen consumption to short-term changes in temperature and irradiance in a cyanobacterial mat (Ebro Delta, Spain). *Environ Microbiol* 2(4):465–474.
4. Epping EH, Khalili A, Thar R (1999) Photosynthesis and the dynamics of oxygen consumption in a microbial mat as calculated from transient oxygen microprofiles. *Limnol Oceanogr* 44:1936–1948.
5. Jonkers HM, et al. (2003) Structural and functional analysis of a microbial mat ecosystem from a unique permanent hypersaline inland lake: 'La Salada de Chiprana' (NE Spain). *FEMS Microbiol Ecol* 44(2):175–189.
6. Krumbein WE, Cohen Y, Shilo M (1977) Solar lake (Sinai). 4. Stromatolitic cyanobacterial mats. *Limnol Oceanogr* 22:635–655.
7. Pringault O, de Wit R, Camoin G (2005) Irradiance regulation of photosynthesis and respiration in modern marine microbialites built by benthic cyanobacteria in a tropical lagoon (New Caledonia). *Microb Ecol* 49(4):604–616.
8. Rasheed M, Wild C, Franke U, Huettel M (2004) Benthic photosynthesis and oxygen consumption in permeable carbonate sediments at Heron Island, Great Barrier Reef, Australia. *Estuar Coast Shelf Sci* 59:139–150.
9. Revsbech NP, Jorgensen BB, Brix O (1981) Primary production of microalgae in sediments measured by oxygen microprofile, H<sup>14</sup>CO<sub>3</sub> fixation, and oxygen exchange methods. *Limnol Oceanogr* 26:717–730.
10. Revsbech NP, Jorgensen BB, Blackburn TH, Cohen Y (1983) Microelectrode studies of the photosynthesis and O<sub>2</sub>, H<sub>2</sub>S, and pH profiles of a microbial mat. *Limnol Oceanogr* 28:1062–1074.
11. Wieland A, Kühl M (2000) Short-term temperature effects on oxygen and sulfide cycling in a hypersaline cyanobacterial mat (Solar Lake, Egypt). *Mar Ecol Prog Ser* 196:87–102.
12. Wieland A, Kühl M (2006) Regulation of photosynthesis and oxygen consumption in a hypersaline cyanobacterial mat (Camargue, France) by irradiance, temperature and salinity. *FEMS Microbiol Ecol* 55(2):195–210.
13. Woelfel J, et al. (2009) Oxygen evolution in a hypersaline crust: In situ photosynthesis quantification by microelectrode profiling and use of planar optode spots in incubation chambers. *Aquat Microb Ecol* 56:263–273.
14. Howard-Williams C, Pridmore R, Downes MT, Vincent WF (1989) Microbial biomass, photosynthesis and chlorophyll a related pigments in the ponds of the McMurdo Ice Shelf, Antarctica. *Antarct Sci* 1:125–131.
15. Howell ET, Turner MA, France RL, Jackson MB, Stokes PM (1990) Comparison of zygneatacean (chlorophyta) algae in the metaphyton of two acidic lakes. *Can J Fish Aquat Sci* 47:1085–1092.
16. Kleeberg A, Schubert H, Koschorreck M, Nixdorf B (2006) Abundance and primary production of filamentous green algae *Zygonium ericetorum* in an extremely acid (pH 2.9) mining lake and its impact on alkalinity generation. *Freshw Biol* 51:925–937.
17. Koschorreck M, Tittel J (2002) Benthic photosynthesis in an acidic mining lake (pH 2.6). *Limnol Oceanogr* 47:1197–1201.
18. Morin A, Cattaneo A (1992) Factors affecting sampling variability of freshwater periphyton and the power of periphyton studies. *Can J Fish Aquat Sci* 49:1695–1703.
19. Turner MA, et al. (1995) Growth characteristics of bloom-forming filamentous green algae in the littoral zone of an experimentally acidified lake. *Can J Fish Aquat Sci* 52:2251–2263.
20. Glud RN, Ramsing NB, Revsbech NP (1992) Photosynthesis and photosynthesis-coupled respiration in natural biofilms quantified with oxygen microsensors. *J Phycol* 28:51–60.
21. Kühl M, Glud RN, Ploug H, Ramsing NB (1996) Microenvironmental control of photosynthesis and photosynthesis-coupled respiration in an epilithic cyanobacterial biofilm. *J Phycol* 32:799–812.
22. Nielsen LP, Christensen PB, Revsbech NP, Sørensen J (1990) Denitrification and photosynthesis in stream sediment studied with microsensor and whole-core techniques. *Limnol Oceanogr* 35:1135–1144.
23. Sheath RG, Vis ML, Hambrook JA, Cole KM (1996) 7. Tundra stream macroalgae of North America: Composition, distribution and physiological adaptations. *Hydrobiologia* 336:67–82.
24. Vincent WF, Howard-Williams C (1986) Antarctic stream ecosystems: Physiological ecology of a blue-green algal epilithon. *Freshw Biol* 16:219–233.
25. Büdel B, et al. (2004) Reshaping of sandstone surfaces by cryptoendolithic cyanobacteria: bioalkalization causes chemical weathering in arid landscapes. *Geobiology* 2:261–268.
26. Garcia-Pichel F, Belpas J (1996) Microenvironments and microscale productivity of cyanobacterial desert crusts. *J Phycol* 32:774–782.
27. Hawes I, Moorhead D, Sutherland D, Schmeling J, Schwarz AM (2001) Benthic primary production in two perennially ice-covered Antarctic lakes: Patterns of biomass accumulation with a model of community metabolism. *Antarct Sci* 13:18–27.
28. Kühl M, Glud RN, Borum J, Roberts R, Rysgaard S (2001) Photosynthetic performance of surface-associated algae below sea ice as measured with a pulse-amplitude-modulated (PAM) fluorometer and O<sub>2</sub> microsensors. *Mar Ecol Prog Ser* 223:1–14.
29. Vopel K, Hawes I (2006) Photosynthetic performance of benthic microbial mats in Lake Hoare, Antarctica. *Limnol Oceanogr* 51:1801–1812.

**Table S2. Compilation of annual O<sub>2</sub> source and sink fluxes (in terms of O<sub>2</sub> equivalents) contributing to Earth's surface redox balance, with additional values relevant to Precambrian redox evolution**

| Ref. | Process                                                    | Annual flux O <sub>2</sub> equivalents* (Tmol/y) |
|------|------------------------------------------------------------|--------------------------------------------------|
| 1    | Modern global primary production                           | 8,734                                            |
| 2, 3 | Estimated Archean global primary production (~1/10 modern) | 800                                              |
| 4    | Upper estimate for Archean CH <sub>4</sub> flux            | 400 <sup>†</sup>                                 |
| 5    | Modern CH <sub>4</sub> flux                                | 60 <sup>†</sup>                                  |
| 6    | Modern organic carbon burial                               | +18.4                                            |
| 6    | Modern oxidative weathering and volcanism                  | -17.9                                            |
| 7    | Fe(III) burial ca. 2.5 Ga                                  | -0.5                                             |
| 8    | Sulfate flux from continents at present                    | -3.500                                           |
| 8    | Sulfate flux from continents 2.5–1 Ga                      | -2.275                                           |
| 8    | Sulfate flux from continents 2.8–2.5 Ga                    | -0.9625                                          |
| 8    | Sulfate flux from continents 3.3–2.8 Ga                    | -0.0963                                          |
| 9    | Archean atmospheric H <sub>2</sub> O <sub>2</sub> rainout  | +0.00004                                         |

Many are as compiled by Claire et al. (4) however primary references are provided where possible; see also Kastings (10) and Catling (11) for detailed treatments.

\*Fluxes directly determining global redox balance are denoted as sources (+) or sinks (-); values not noted as such do not directly determine global redox balance and/or are included simply for comparison. O<sub>2</sub> equivalents were calculated from sulfate fluxes conservatively assuming the pyrite oxidation reaction  $\text{FeS}_2 + 3.5\text{O}_2 + \text{H}_2\text{O} \rightarrow \text{Fe}^{2+} + 2\text{SO}_4^{2-} + 2\text{H}^+$ .

<sup>†</sup>Methane production has an indirect positive contribution to atmospheric oxidation by its promotion of hydrogen escape, which itself is dependent on atmospheric CH<sub>4</sub> concentrations [see discussion by Claire et al. (4)]. It is thus included for comparison only.

- Field CB, Behrenfeld MJ, Randerson JT, Falkowski P (1998) Primary production of the biosphere: integrating terrestrial and oceanic components. *Science* 281(5374):237–240.
- Canfield D (2005) The early history of atmospheric oxygen: Homage to Robert A. Garrels. *Annu Rev Earth Planet Sci* 33:1–36.
- Kharecha P, Kasting J, Siefert J (2005) A coupled atmosphere-ecosystem model of the early Archean Earth. *Geobiology* 3:53–76.
- Claire MW, Catling DC, Zahnle KJ (2006) Biogeochemical modelling of the rise in atmospheric oxygen. *Geobiology* 4:239–269.
- Watson RT, Rodhe H, Oeschger H, Siegenthaler U (1990) Greenhouse gases and aerosols. *Climate Change: The IPCC Scientific Assessment*, eds Houghton JT, Jenkins GJ, Ephraums JJ (Cambridge Univ Press, Cambridge), pp 1–40.
- Holland HD (2002) Volcanic gases, black smokers, and the Great Oxidation Event. *Geochim Cosmochim Acta* 66:3811–3826.
- Holland HD (2006) The oxygenation of the atmosphere and oceans. *Philos Trans R Soc Lond B Biol Sci* 361(1470):903–915.
- Stüeken EE, Catling DC, Buick R (2012) Contributions to late Archean sulphur cycling by life on land. *Nat Geosci* 5:722–725.
- Haqq-Misra J, Kasting JF, Lee S (2011) Availability of O<sub>2</sub> and H<sub>2</sub>O<sub>2</sub> on pre-photosynthetic Earth. *Astrobiology* 11(4):293–302.
- Kasting JF (2013) What caused the rise of atmospheric O<sub>2</sub>? *Chem Geol* 362:13–25.
- Catling DC (2014) The Great Oxidation Event Transition. *Treatise on Geochemistry*, eds Turekian KK, Holland HD (Elsevier, Amsterdam), 2nd Ed, pp 177–195.
